# Supplementary material
Source: Elsevier journal article supplement (https://www.sciencedirect.com/science/article/pii/S0213911112002348)
Supplement: mmc1 [file S0213911112002348:mmc1.docx]

**Apéndice**

Las 15 comunidades autónomas donde se realizaron las 41 entrevistas en profundidad, fueron las siguientes: Andalucía (4), Aragón (2), Asturias (2), Cantabria (1), Castilla-La Mancha (3), Cataluña (5), Extremadura (2), Galicia (2) Islas Baleares (3), Islas Canarias (5), Madrid (3), Murcia (1), Navarra (3), País Vasco (2) y Comunidad Valenciana (2).

*Guión de la entrevista en profundidad*

Además de indagar sobre el comienzo de la enfermedad (conocimiento previo y creencias sobre el cáncer de mama, primeros síntomas y búsqueda de atención sanitaria), el impacto o las repercusiones en la vida personal, familiar, afectivo-sexual y laboral, entre otros temas, algunas de las preguntas del guión de las entrevistas se orientaban a los siguientes ejes de indagación:

| **Objetivo-ejes de indagación** | **Preguntas** |
| --- | --- |
| *Proceso diagnóstico*  Valoración de la información recibida | ¿Qué información recibió respecto al diagnóstico? ¿Quién le informó? ¿Recibió material informativo de apoyo? ¿De qué tipo? ¿Le resultó útil/adecuado/comprensible? ¿Se quedó satisfecha/o con la información recibida? ¿Considera que necesitó más información? |
| Inicio y tipo de tratamiento, e Información recibida | Tiempo transcurrido desde el diagnóstico hasta el inicio de los tratamientos. ¿Cómo ha cambiado su vida desde el diagnóstico? Relate los tratamientos realizados, tiempo transcurrido, efectos/consecuencias y valoración de la atención recibida. ¿Considera que le han ofrecido suficiente información sobre su enfermedad? ¿Esa información le ha sido útil? ¿Considera que ha sido suficientemente informada/o sobre beneficios y riesgos de pruebas y tratamientos? ¿Le han ofrecido la posibilidad de optar por más de un tratamiento? ¿Ha tenido alguna repetición de cáncer? |
| Participación u apoyo de asociaciones de pacientes o de otro tipo | ¿Ha buscado algún tipo de apoyo? (en asociaciones de pacientes o con otras personas en su misma situación) ¿Ha recibido apoyo de familiares o amigos? ¿De qué tipo? |
| Búsqueda de información y recursos utilizados | ¿Utiliza habitualmente Internet para temas de salud? ¿Ha utilizado Internet para buscar información sobre el cáncer de mama? ¿Cuándo lo hizo y por qué motivos? Lo utiliza sola/o o con ayuda de otra persona? Valoración de Internet como recurso de salud y tipo de páginas consultadas. |
| *Relación con el personal sanitario*  Valoración de la atención recibida | ¿Cómo valora a los diferentes profesionales que le han atendido en el proceso de la enfermedad?¿Podría describir cómo ha sido su relación con los profesionales que le han atendido? ¿Cambiaría algún aspecto de la atención recibida? ¿Considera que hay carencias en la atención sanitaria? ¿Cuáles? |
